# Supplementary material
Source: MDPI journal article supplement (https://www.mdpi.com/2075-163X/9/7/442)
Supplement: s1 [file s1]

## Supplementary Materials

**Table S1.** Operating conditions for LA-ICP-MS.

| ICP-MS                  |                                                           |               |
|-------------------------|-----------------------------------------------------------|---------------|
| Instrument:             | Agilent 7700cx (Agilent Technology)                       |               |
| Forward power:          | 1550W                                                     |               |
| Gas flow rate           | Cool                                                      | 15 L/min      |
|                         | Auxiliary                                                 | 1.0 L/min     |
|                         | Nebuliser                                                 | 0.9–1.0 L/min |
|                         | Carrier He                                                | 0.80 L/min    |
| Scanning mode:          | Peak jump                                                 |               |
| Analysis mode:          | Time resolved analysis (TRA)                              |               |
| Integration mode:       | 30sec/sample                                              |               |
|                         |                                                           |               |
| Laser Ablation system   |                                                           |               |
| Instrument:             | New Wave Research NWR213                                  |               |
| Laser:                  | Nd: YAG laser                                             |               |
| Wavelength:             | 213 μm                                                    |               |
| Pulse energy:           | >30 Jcm <sup>-2</sup>                                     |               |
| Crater size:            | 100 μm                                                    |               |
| Repetition rate:        |                                                           |               |
| Sample cell:            | 100 × 100mm <sup>2</sup> × 30mm (deep)                    |               |
| Nebuliser gas flowrate: | 0.97 L/min                                                |               |
| Plasma gas flow:        | 15 L/min                                                  |               |
| Detector mode:          | Pulse-counting/analogue-counting automatic switching mode |               |
| Calculation software:   | MassHunter                                                |               |

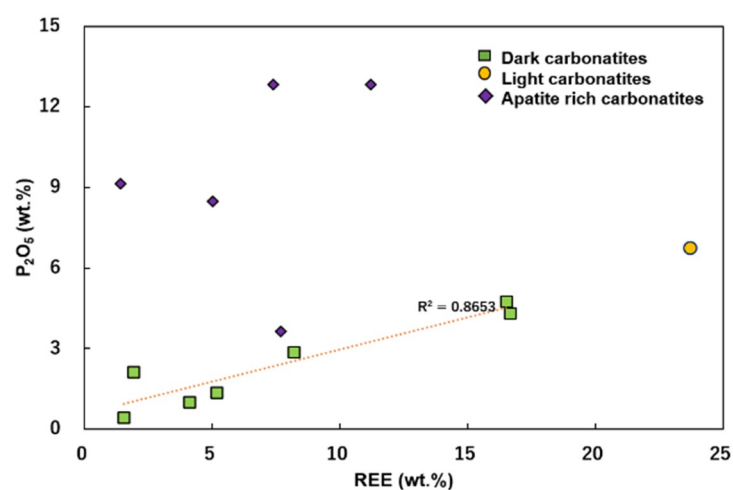

**Figure S1.** Correlation of P vs TREE concentrations in the light and dark carbonatites.

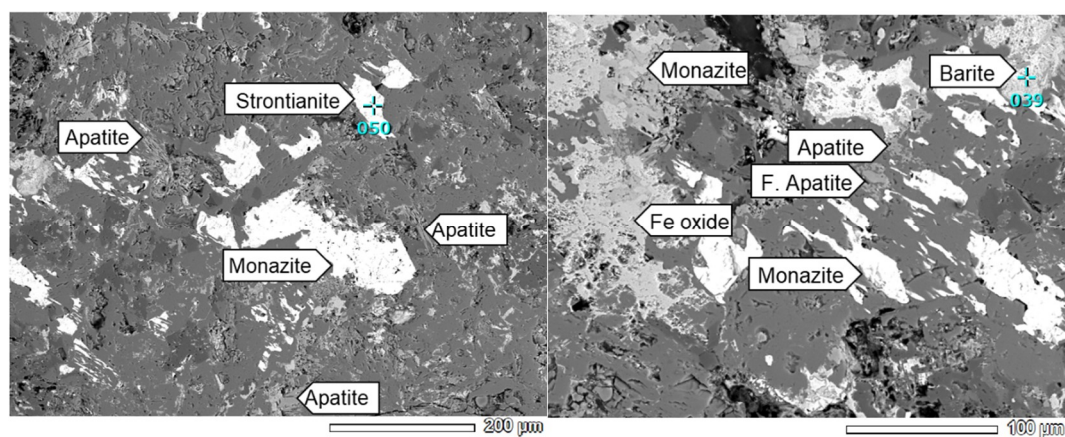

**Figure S2.** Apatite abundance in apatite-rich carbonatites.

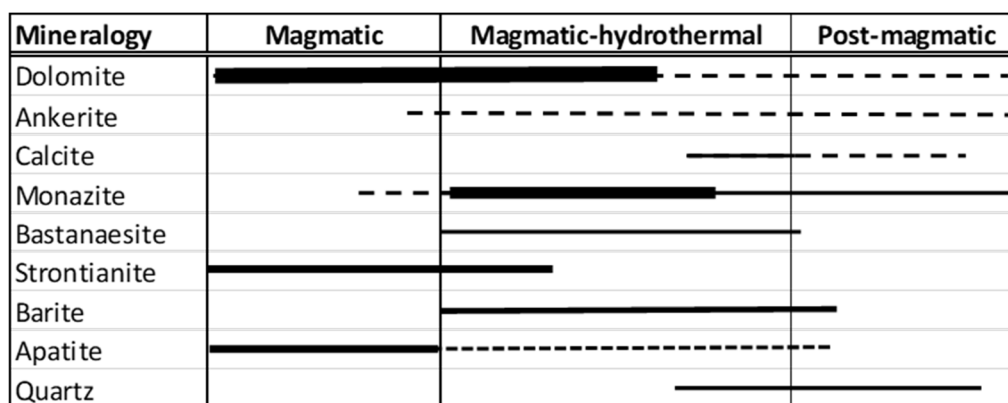

**Figure S3.** Paragenetic sequence of mineral occurrence in the Kangankunde carbonatite.

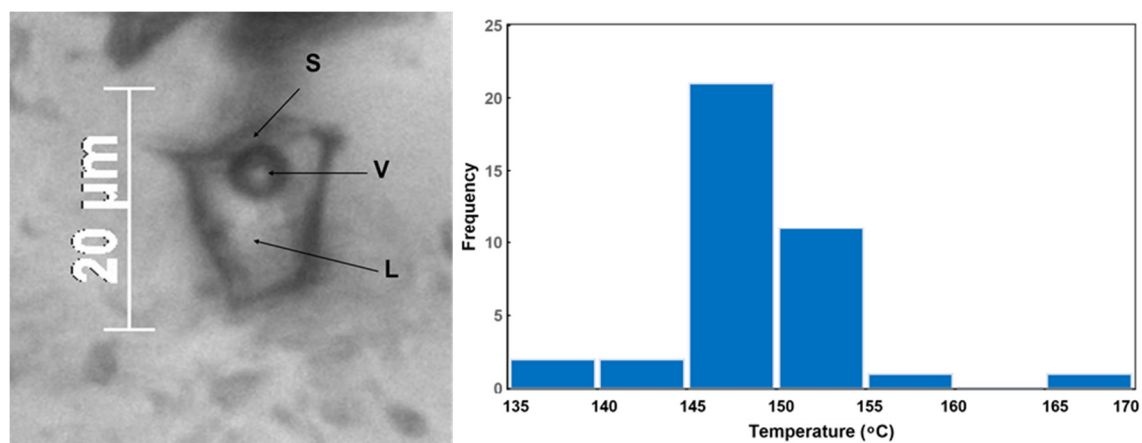

**Figure S4.** Fluid inclusion in dolomite and the homogenization temperature of most inclusions.
